# Supplementary material
Source: PubMed Central journal article supplement (PMC3743509)
Supplement: supp_M113.492603_jbc.M113.492603-1.pdf [file supp_M113.492603_jbc.M113.492603-1.pdf]

**a.** Area under the curves of the intensity signal for the heavy and light peptides used for quantification of Collectin-L1. Values are displayed for all 15 measurements. Values are raw values exported from Skyline.

| PeptideSequence | IsotopeLabelType | rCL-L1 - 1 + 50fmol [H] - 1 TotalArea | rCL-L1 - 1 + 50fmol [H] - 2 TotalArea | rCL-L1 - 1 + 50fmol [H] - 3 TotalArea | rCL-L1 - 1 + 50fmol [H] - 4 TotalArea | rCL-L1 - 1 + 50fmol [H] - 5 TotalArea | rCL-L1 - 2 + 50fmol [H] - 1 TotalArea | rCL-L1 - 2 + 50fmol [H] - 2 TotalArea | rCL-L1 - 2 + 50fmol [H] - 3 TotalArea | rCL-L1 - 2 + 50fmol [H] - 4 TotalArea | rCL-L1 - 2 + 50fmol [H] - 5 TotalArea | rCL-L1 - 3 + 50fmol [H] - 1 TotalArea | rCL-L1 - 3 + 50fmol [H] - 2 TotalArea | rCL-L1 - 3 + 50fmol [H] - 3 TotalArea | rCL-L1 - 3 + 50fmol [H] - 4 TotalArea | rCL-L1 - 3 + 50fmol [H] - 5 TotalArea |
|-----------------|------------------|---------------------------------------|---------------------------------------|---------------------------------------|---------------------------------------|---------------------------------------|---------------------------------------|---------------------------------------|---------------------------------------|---------------------------------------|---------------------------------------|---------------------------------------|---------------------------------------|---------------------------------------|---------------------------------------|---------------------------------------|
| GLLGIPGEK       | light            | 238805                                | 184969                                | 212694                                | 205948                                | 206795                                | 1828317                               | 2424371                               | 3153251                               | 1816910                               | 1798511                               | 2134684                               | 2077398                               | 2040242                               | 1961852                               | 2116114                               |
| GLLGIPGEK       | heavy            | 243591                                | 188644                                | 217688                                | 198900                                | 209930                                | 1904984                               | 2473677                               | 3253944                               | 1909306                               | 1868788                               | 2239236                               | 2140399                               | 2072418                               | 2044105                               | 2221146                               |
| DEAANTLIADYVAK  | light            | 102182                                | 98357                                 | 105137                                | 121660                                | 121383                                | 830659                                | 1120421                               | 1475187                               | 917766                                | 898146                                | 984518                                | 1066284                               | 1214983                               | 1219513                               | 1089707                               |
| DEAANTLIADYVAK  | heavy            | 148188                                | 159154                                | 146928                                | 172141                                | 168199                                | 1152371                               | 1652243                               | 2091211                               | 1262789                               | 1291350                               | 1344991                               | 1497904                               | 1716789                               | 1720524                               | 1554600                               |
| VFIGVNDLER      | light            | 643965                                | 403404                                | 448915                                | 454900                                | 491094                                | 6010322                               | 8778873                               | 9899755                               | 6143133                               | 6173431                               | 6917766                               | 6644396                               | 7019782                               | 7048292                               | 6700037                               |
| VFIGVNDLER      | heavy            | 319282                                | 189904                                | 215615                                | 214475                                | 235970                                | 3138612                               | 4467591                               | 5001695                               | 3210749                               | 3139947                               | 3364937                               | 3326158                               | 3521256                               | 3541896                               | 3281055                               |

**b.** Average area values and ratio between the light and heavy labeled peptides. Average values for the three peptides were summed to generate an intensity value for the endogenous Collectin-L1.

| PeptideSequence | rCL-L1 - 1 |            |                   | rCL-L1 - 2 |            |                   | rCL-L1 - 3 |            |                   |
|-----------------|------------|------------|-------------------|------------|------------|-------------------|------------|------------|-------------------|
|                 | Light Area | Heavy Area | Light/Heavy Ratio | Light Area | Heavy Area | Light/Heavy Ratio | Light Area | Heavy Area | Light/Heavy Ratio |
| GLLGIPGEK       | 209842,2   | 211750,6   | 99,1%             | 2204272    | 2282139,8  | 96,6%             | 2066058    | 2143460,8  | 96,4%             |
| DEAANTLIADYVAK  | 109743,8   | 158922     | 69,1%             | 1048435,8  | 1489992,8  | 70,4%             | 1115001    | 1566961,6  | 71,2%             |
| VFIGVNDLER      | 488455,6   | 235049,2   | 207,8%            | 7401102,8  | 3791718,8  | 195,2%            | 6866054,6  | 3407060,4  | 201,5%            |
| <b>Total</b>    | 808041,6   | 605721,8   | 133,4%            | 10653810,6 | 7563851,4  | 140,9%            | 10047113,6 | 7117482,8  | 141,2%            |

**c.** The intensity value for the endogenous Collectin-L1 was normalized against the intensity of the known amount of heavy labeled peptides – 50 fmol.

This corresponds to about 70 fmol of endogenous protein on the column or about 47.21 fmol/μl Collectin-L1 in the analyzed samples with a standard deviation of 2.7%.

|                     | Heavy amount on column (fmol) | Endogenous amount on column (fmol) | fmol / μl |
|---------------------|-------------------------------|------------------------------------|-----------|
| rCL-L1 - Analysis 1 | 50                            | 66,70                              | 45,82     |
| rCL-L1 - Analysis 2 | 50                            | 70,43                              | 47,54     |
| rCL-L1 - Analysis 3 | 50                            | 70,58                              | 48,28     |
| <b>Average</b>      |                               | 69,24                              | 47,21     |
| <b>Std.Dev</b>      |                               |                                    | 1,26      |
| <b>%</b>            |                               |                                    | 2,67%     |
